# Supplementary material for: Machine-Learning Assisted Discrimination of Precancerous and Cancerous from Healthy Oral Tissue Based on Multispectral Autofluorescence Lifetime Imaging Endoscopy
Source: Cancers (Basel). 2021 Sep 23;13(19):4751. doi: 10.3390/cancers13194751 (PMC8507537; doi:10.3390/cancers13194751)
Supplement: Supplementary file 1 [file cancers-13-04751-s001.zip › cancers-1293841-supplementary.pdf]

## Supplemental Material

Figure S1 shows the posterior probability maps produced by the SVM-QDA ensemble classification model (red intensity scale) superposed on the total fluorescence intensity maps (grey intensity scale) for all maFLIM images in the testing set.

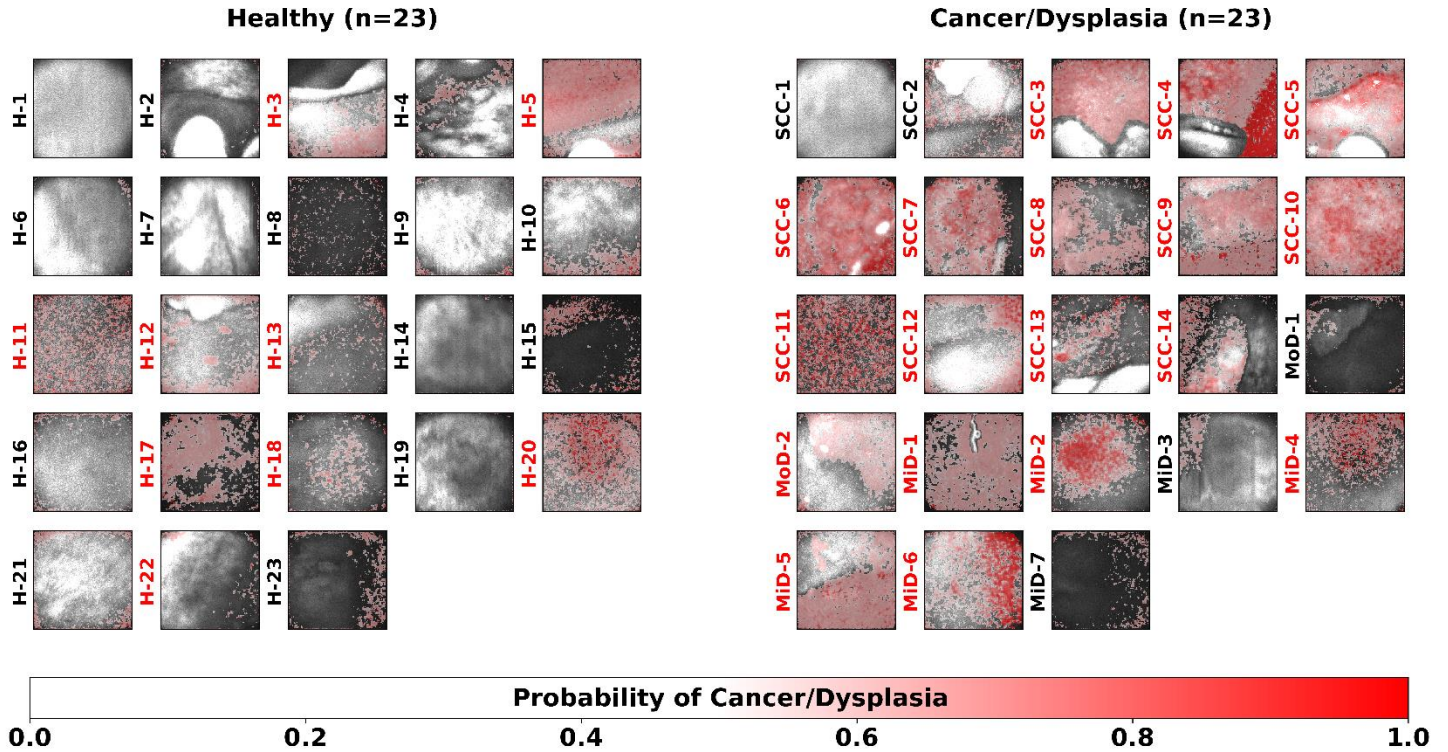

**Figure. S1.** Posterior probability maps (red intensity scale) superposed on the total fluorescence intensity maps (grey intensity scale) of 23 dysplastic/cancerous oral lesions and paired healthy oral tissues obtained from the SVM-QDA ensemble classifier. Sample identification numbers are shown on the left of each map and color-coded in red if classified positive according to the predicted image-level classification.

Table S1 presents the confusion matrices resulting from the application of the optimal classification models to the testing set. The sensitivity, specificity, and F-1 score were computed after applying an image-level score threshold optimized on the training set by selecting the point on the ROC curve with maximum sensitivity within the (1-specificity) range of 0%-30%. The images in the testing set were classified as positive (dysplasia/cancer) if the image-level scores were greater than or equal to the threshold obtained from the training set, or as negative (healthy) otherwise.

The spectral-only SVM model achieved very high specificity (87%), but very low sensitivity (22%) and F1-score of 0.32, while the time-resolved-only QDA model displayed higher sensitivity (74%) but lower specificity (52%) and F1-score of 0.67. The SVM-QDA ensemble model achieved more balanced levels of sensitivity (78%), specificity (61%), and F1-score (0.72). Noticeable, 12 out of 14 (>85%) of SCC lesions were correctly classified.

**Table S1.** Confusion matrices resulting from the application of the optimal classification models to the testing set (**MiD**: Mild Dysplasia; **MoD**: Moderate Dysplasia; **SCC**: Squamous Cell Carcinoma)

|      |                | Predicted         |     |                        |     |                       |     |
|------|----------------|-------------------|-----|------------------------|-----|-----------------------|-----|
|      |                | SVM<br>(Spectral) |     | QDA<br>(Time-Resolved) |     | SVM-QDA<br>(Ensemble) |     |
|      |                | (-)               | (+) | (-)                    | (+) | (-)                   | (+) |
| True | Healthy (n=23) | 20                | 3   | 12                     | 11  | 14                    | 9   |
|      | MiD (n=7)      | 5                 | 2   | 3                      | 4   | 2                     | 5   |
|      | MoD (n=2)      | 2                 | 0   | 1                      | 1   | 1                     | 1   |
|      | SCC (n=14)     | 11                | 3   | 2                      | 12  | 2                     | 12  |
|      | Total          | 38                | 8   | 18                     | 28  | 19                    | 27  |
